# Supplementary material
Source: PubMed Central journal article supplement (PMC4967392)
Supplement: NIHMS778842-supplement-01.pdf [file NIHMS778842-supplement-01.pdf]

## Figure Legends

Figure 1: Odds ratios of having a daughter overweight/obese at midlife in mothers who exceeded (red) and did not exceed (blue) IOM 2009 guidelines for gestational weight gain, adjusted for maternal age and race. ORs and 95% CI depicted as boxes and bars are in reference to mothers with a BMI<25, who did not exceed guidelines. P-trend= $\leq 0.001$ . Strata specific ORs and 95% CI are noted beneath the brackets.

Supplemental Figure: Percentage of Early Determinants of Mammographic Density (EDMD) cohort who exceeded the guidelines according to decade by the World Health Organization's pre-pregnancy BMI categories and projection of percent of daughters who will be overweight in 2050.

| % of EDMD cohort who exceeded decade-specific guidelines |                 |                 |                                                |                                              |                                                                                                     |
|----------------------------------------------------------|-----------------|-----------------|------------------------------------------------|----------------------------------------------|-----------------------------------------------------------------------------------------------------|
| Year and guideline                                       | 1960<br>≥14 lbs | 1970<br>≥25 lbs | 1990<br>>20-40 lbs according to BMI categories | 2009<br>>20-40 lbs, by WHO categories of BMI | 2050                                                                                                |
| Any BMI                                                  | 80%             | 26%             | 9%                                             | 10%                                          | %50 of daughters born to US women in 2010 will be overweight or obese when they reach mid-adulthood |
| BMI <25                                                  | 85%             | 27%             | 4%                                             | 4%                                           |                                                                                                     |
| BMI 25-30                                                | 70%             | 24%             | 19%                                            | 24%                                          |                                                                                                     |
| BMI 30+                                                  | 55%             | 19%             | 36%                                            | 36%                                          |                                                                                                     |
